# Supplementary material
Source: PubMed Central journal article supplement (PMC3809153)
Supplement: NIHMS487495-supplement-01.pdf [file NIHMS487495-supplement-01.pdf]

**Supplementary Table 1. Biological Information on *SLC6A4*, *HTR3B*, and *HTR3A* Polymorphisms Examined in This Study<sup>a</sup>**

| Gene   | SNP No. | dbSNP ID   | Location Within the Gene | Chromosomal Location                     | Alleles | Minor Allele Frequency (Minor Allele) <sup>b</sup> | p-Values for Deviation from Hardy-Weinberg Equilibrium <sup>c</sup> |               | Primers and Probe Sequences / Context<br>Sequence ID of ABI Primers and Probes |
|--------|---------|------------|--------------------------|------------------------------------------|---------|----------------------------------------------------|---------------------------------------------------------------------|---------------|--------------------------------------------------------------------------------|
|        |         |            |                          |                                          |         |                                                    | OND Group                                                           | Placebo Group |                                                                                |
| SLC6A4 | 1       | 5'-HTTLPR  | promoter                 | 25,588,443 to<br>25,588,485 <sup>d</sup> | L/S     | 0.450 (S)                                          | 1.000                                                               | 0.779         | Forward: TCCTCCGCTTTGGCGCCTCTTCC<br>Reverse: TGGGGGTTGCAGGGGAGATCCTG           |
|        | 2       | rs1042173  | 3'-UTR                   | 25,549,137                               | T/G     | 0.425 (G)                                          | 0.790                                                               | 0.930         | C_7473190_10                                                                   |
| HTR3A  | 3       | rs1150226  | 5'-near gene             | 113,350,751                              | G/A     | 0.058 (A)                                          | 0.545                                                               | 0.675         | C_7488474_10                                                                   |
|        | 4       | rs1062613  | 5'-UTR                   | 113,351,216                              | C/T     | 0.214 (T)                                          | 0.989                                                               | 0.258         | C_7488465_10                                                                   |
|        | 5       | rs33940208 | Exon 1(L168L)            | 113,351,287                              | C/T     | not reported (T=0.017 <sup>e</sup> )               | 1.000                                                               | 1.000         | C_22275584_10                                                                  |
|        | 6       | rs1176722  | Intron 1                 | 113,353,684                              | A/G     | 0.159 (A)                                          | 0.793                                                               | 0.645         | C_7488431_10                                                                   |
|        | 7       | rs1176720  | Intron 2                 | 113,354,963                              | C/G     | 0.186 (G)                                          | 0.678                                                               | 1.000         | C_1646939_10                                                                   |
|        | 8       | rs2276302  | Intron 3                 | 113,355,350                              | A/G     | 0.319 (G)                                          | 1.000                                                               | 0.061         | C_1646938_1_                                                                   |
|        | 9       | rs1176719  | Intron 4                 | 113,357,397                              | A/G     | not reported (A=0.258 <sup>e</sup> )               | 0.365                                                               | 0.878         | C_1372135_1_                                                                   |
|        | 10      | rs10160548 | Intron 5                 | 113,361,891                              | G/T     | 0.341 (G)                                          | 0.356                                                               | 0.255         | C_1372126_10                                                                   |
|        | 11      | rs1150220  | Intron 7                 | 113,363,096                              | C/T     | not reported (T=0.233 <sup>e</sup> )               | 1.000                                                               | 0.525         | C_7488415_1_                                                                   |
|        | 12      | rs1176713  | Exon 8 (L459L)           | 113,365,635                              | G/A     | 0.257 (G)                                          | 1.000                                                               | 0.835         | C_1372122_10                                                                   |
| HTR3B  | 13      | rs3758987  | 5'-near gene             | 113,280,485                              | T/C     | 0.252 (C)                                          | 0.746                                                               | 0.452         | C_27512451_10                                                                  |
|        | 14      | rs11606194 | Intron 2                 | 113,286,191                              | T/C     | 0.097 (C)                                          | 0.766                                                               | 1.000         | C_26324626_10                                                                  |
|        | 15      | rs4938056  | Intron 2                 | 113,291,749                              | C/T     | 0.376 (T)                                          | 0.615                                                               | 0.240         | C_3053567_10                                                                   |
|        | 16      | rs12270070 | Intron 2                 | 113,304,257                              | G/C     | 0.226 (C)                                          | 0.325                                                               | 0.587         | C_3053563_10                                                                   |
|        | 17      | rs1176746  | Intron 4                 | 113,307,811                              | G/A     | 0.425 (A)                                          | 0.154                                                               | 0.354         | C_7488605_10                                                                   |
|        | 18      | rs1176744  | Exon 5 (Y129S)           | 113,308,238                              | A/C     | 0.292 (C)                                          | 0.972                                                               | 0.437         | C_7488596_1_                                                                   |
|        | 19      | rs2276307  | Intron 6                 | 113,309,097                              | A/G     | 0.226 (G)                                          | 0.821                                                               | 0.870         | C_1646949_1_                                                                   |
|        | 20      | rs1672717  | Intron 6                 | 113,317,943                              | A/G     | 0.425 (G)                                          | 1.000                                                               | 1.000         | C_3053558_10                                                                   |
|        | 21      | rs17614942 | Intron 8                 | 113,321,587                              | C/A     | 0.049 (A)                                          | 0.987                                                               | 1.000         | C_32983576_10                                                                  |

<sup>a</sup>All chromosomal locations are in reference to: NC\_000017.9 for *SLC6A4*, NM\_006028.3 for *HTR3B*, and NM\_213621.1 for *HTR3A*. SNP=single-nucleotide polymorphism; ABI=Applied Biosystems (Foster City, CA); OND=ondansetron.

<sup>b</sup>From HapMap CEU (European ancestry) sample.

<sup>c</sup>Data from this study.

<sup>d</sup>Reference citation: Garcia LF, Aluja A, Fibla J, Cuevas L, Garcia O: Incremental effect for antisocial personality disorder genetic risk combining 5-HTTLPR and 5-HTTVNTR polymorphisms. *Psychiatry Res* 2010; 177:161-166.

<sup>e</sup>pilot\_1\_CEU\_low\_coverage\_panel.

**Supplementary Table 2. Mean Drinks per Drinking Day Estimates in All Examined Genotype Groups<sup>a</sup>**

| Gene         | SNP        | Genotype  | DDD in Ondansetron Group |        |       |      | DDD in Placebo Group |        |       |       | Ondansetron vs. Placebo Comparison |        |       |                            |                  |                                           |       |
|--------------|------------|-----------|--------------------------|--------|-------|------|----------------------|--------|-------|-------|------------------------------------|--------|-------|----------------------------|------------------|-------------------------------------------|-------|
|              |            |           | Estimate                 | 95% CI |       | N    | Estimate             | 95% CI |       | N     | Estimate                           | 95% CI |       | p-Value for DDD Difference | FDR <sup>b</sup> | p-Value for Genotype Frequency Difference |       |
|              |            |           |                          | Lower  | Upper |      |                      | Lower  | Upper |       |                                    | Lower  | Upper |                            |                  |                                           |       |
| <i>HTR3A</i> | rs1150226  | AG        | 4.18                     | 2.91   | 5.44  | 20   | 6.00                 | 4.84   | 7.16  | 24    | -1.82                              | -3.53  | -0.12 | 0.036                      | 0.311            | 0.968                                     |       |
|              |            | GG        | 6.11                     | 5.53   | 6.69  | 113  | 6.04                 | 5.49   | 6.6   | 115   | 0.07                               | -0.68  | 0.81  | 0.859                      |                  | 0.970                                     |       |
|              | rs1062613  | CC        | 3.70                     | 1.37   | 6.04  | 6    | 4.47                 | 1.62   | 7.32  | 4     | -0.76                              | -4.44  | 2.91  | 0.682                      |                  | 0.474                                     |       |
|              |            | TC        | 5.21                     | 4.36   | 6.05  | 48   | 6.29                 | 5.5    | 7.07  | 54    | -1.08                              | -2.21  | 0.05  | 0.061                      |                  | 0.416                                     |       |
|              |            | TT        | 6.27                     | 5.61   | 6.92  | 81   | 5.9                  | 5.25   | 6.56  | 82    | 0.36                               | -0.51  | 1.24  | 0.417                      |                  | 0.675                                     |       |
|              | rs33940208 | CC        | 5.76                     | 5.19   | 6.34  | 123  | 6.01                 | 5.47   | 6.55  | 126   | -0.24                              | -0.97  | 0.47  | 0.498                      |                  | 0.754                                     |       |
|              |            | CT        | 6.06                     | 4.09   | 8.04  | 12   | 6.12                 | 4.34   | 7.9   | 14    | -0.06                              | -2.30  | 2.19  | 0.962                      |                  | 0.754                                     |       |
|              | rs1176722  | AA        | 2.25                     | -2     | 6.51  | 2    | 4.69                 | 1.78   | 7.6   | 4     | -2.43                              | -7.59  | 2.72  | 0.355                      |                  | 0.408                                     |       |
|              |            | AG        | 5.93                     | 4.93   | 6.93  | 36   | 6.51                 | 5.49   | 7.54  | 32    | -0.58                              | -1.98  | 0.82  | 0.415                      |                  | 0.329                                     |       |
|              |            | GG        | 5.88                     | 5.25   | 6.5   | 94   | 6.01                 | 5.4    | 6.62  | 99    | -0.13                              | -0.95  | 0.68  | 0.749                      |                  | 0.618                                     |       |
|              | rs1176720  | CC        | 2.21                     | -2.02  | 6.45  | 2    | 7.55                 | 4.2    | 10.91 | 3     | -5.34                              | -10.76 | 0.08  | 0.053                      |                  | 0.663                                     |       |
|              |            | CG        | 5.85                     | 4.88   | 6.82  | 38   | 6.08                 | 5.12   | 7.04  | 36    | -0.23                              | -1.57  | 1.09  | 0.730                      |                  | 0.578                                     |       |
|              |            | GG        | 5.83                     | 5.22   | 6.44  | 95   | 5.94                 | 5.34   | 6.54  | 101   | -0.11                              | -0.92  | 0.7   | 0.788                      |                  | 0.861                                     |       |
|              | rs2276302  | AA        | 6.13                     | 5.42   | 6.85  | 67   | 6.13                 | 5.35   | 6.9   | 57    | 0.01                               | -1.01  | 1.02  | 0.989                      |                  | 0.423                                     |       |
|              |            | AG        | 5.77                     | 4.97   | 6.57  | 57   | 5.97                 | 5.28   | 6.66  | 73    | -0.20                              | -1.20  | 0.8   | 0.695                      |                  | 0.203                                     |       |
|              |            | GG        | 3.82                     | 2.05   | 5.59  | 11   | 5.94                 | 4.12   | 7.76  | 10    | -2.12                              | -4.65  | 0.4   | 0.099                      |                  | 0.761                                     |       |
|              |            | rs1176719 | AA                       | 4.33   | 2.50  | 6.16 | 11                   | 7.65   | 5.92  | 9.38  | 11                                 | -3.32  | -5.78 | -0.86                      | 0.008            | 0.172                                     | 0.872 |
|              |            |           | AG                       | 5.94   | 5.08  | 6.81 | 46                   | 5.22   | 4.45  | 5.98  | 60                                 | 0.73   | -0.38 | 1.83                       | 0.197            |                                           | 0.278 |
|              |            |           | GG                       | 5.88   | 5.21  | 6.54 | 78                   | 6.46   | 5.76  | 7.15  | 69                                 | -0.58  | -1.49 | 0.34                       | 0.215            |                                           | 0.373 |
|              | rs10160548 | GG        | 4.69                     | 3.11   | 6.26  | 14   | 5.73                 | 4.52   | 6.93  | 24    | -1.04                              | -2.97  | 0.89  | 0.289                      |                  | 0.119                                     |       |
|              | GT         | 5.82      | 5.08                     | 6.55   | 68    | 6.25 | 5.48                 | 7.02   | 59    | -0.44 | -1.45                              | 0.58   | 0.400 |                            | 0.088            |                                           |       |
|              | TT         | 6.01      | 5.21                     | 6.81   | 53    | 5.88 | 5.1                  | 6.66   | 57    | 0.13  | -0.95                              | 1.21   | 0.811 |                            | 0.641            |                                           |       |
| rs1150220    | AA         | 2.69      | -0.46                    | 5.84   | 4     | 6.79 | 4.25                 | 9.33   | 5     | -4.10 | -8.15                              | -0.06  | 0.047 |                            | 0.833            |                                           |       |
|              | AG         | 5.60      | 4.66                     | 6.53   | 40    | 5.91 | 5.1                  | 6.71   | 52    | -0.31 | -1.5                               | 0.87   | 0.610 |                            | 0.615            |                                           |       |
|              | GG         | 5.96      | 5.34                     | 6.58   | 91    | 5.95 | 5.3                  | 6.6    | 82    | 0.01  | -0.85                              | 0.86   | 0.983 |                            | 0.365            |                                           |       |
|              | rs1176713  | GG        | 4.43                     | 1.94   | 6.93  | 6    | 8.34                 | 6.45   | 10.23 | 9     | -3.91                              | -6.99  | -0.82 | 0.013                      | 0.172            | 0.511                                     |       |
|              |            | AG        | 5.45                     | 4.58   | 6.32  | 46   | 5.58                 | 4.79   | 6.36  | 57    | -0.13                              | -1.25  | 0.99  | 0.824                      |                  | 0.837                                     |       |

|              |           |      |       |       |      |      |       |      |      |       |        |       |       |       |       |
|--------------|-----------|------|-------|-------|------|------|-------|------|------|-------|--------|-------|-------|-------|-------|
|              | AA        | 6.05 | 5.4   | 6.7   | 82   | 6.06 | 5.38  | 6.74 | 73   | -0.01 | -0.91  | 0.89  | 0.982 | 0.189 |       |
| <i>HTR3B</i> | rs3758987 | CC   | 6.52  | 4.81  | 8.22 | 11   | 4.92  | 3.00 | 6.83 | 9     | 1.60   | -0.96 | 4.16  | 0.220 | 0.533 |
|              |           | CT   | 5.76  | 4.9   | 6.62 | 51   | 6.32  | 5.57 | 7.08 | 62    | -0.57  | -1.65 | 0.52  | 0.306 | 0.322 |
|              |           | TT   | 5.73  | 5.02  | 6.43 | 70   | 5.85  | 5.14 | 6.56 | 69    | -0.13  | -1.1  | 0.85  | 0.801 | 0.969 |
| rs11606194   | CC        | 0.08 | -5.83 | 5.99  | 1    | 2.14 | -3.45 | 7.74 | 1    | -2.07 | -10.23 | 6.09  | 0.620 | 0.846 |       |
|              | CT        | 6.66 | 5.13  | 8.18  | 14   | 5.66 | 4.50  | 6.82 | 25   | 0.995 | -0.90  | 2.89  | 0.302 | 0.450 |       |
|              | TT        | 5.71 | 5.14  | 6.29  | 117  | 6.14 | 5.58  | 6.7  | 114  | -0.43 | -1.17  | 0.32  | 0.261 | 0.669 |       |
| rs4938056    | CC        | 6.56 | 5.63  | 7.48  | 40   | 5.86 | 5     | 6.71 | 47   | 0.70  | -0.51  | 1.91  | 0.259 | 0.566 |       |
|              | CT        | 5.36 | 4.61  | 6.1   | 62   | 6.23 | 5.48  | 6.97 | 61   | -0.88 | -1.9   | 0.15  | 0.095 | 0.645 |       |
|              | TT        | 5.86 | 4.78  | 6.94  | 30   | 5.98 | 4.94  | 7.02 | 31   | -0.12 | -1.58  | 1.34  | 0.870 | 0.892 |       |
| rs12270070   | CC        | 3.3  | -0.05 | 6.65  | 3    | 6.18 | 4.07  | 8.3  | 7    | -2.88 | -6.83  | 1.07  | 0.153 | 0.213 |       |
|              | CG        | 6.2  | 5.34  | 7.06  | 48   | 5.83 | 4.93  | 6.74 | 42   | 0.37  | -0.83  | 1.57  | 0.548 | 0.147 |       |
|              | GG        | 5.64 | 4.99  | 6.29  | 84   | 6.09 | 5.47  | 6.71 | 91   | -0.45 | -1.31  | 0.41  | 0.302 | 0.480 |       |
| rs1176746    | AA        | 5.44 | 4.22  | 6.67  | 22   | 6.16 | 5.01  | 7.31 | 25   | -0.72 | -2.38  | 0.94  | 0.394 | 0.729 |       |
|              | AG        | 6.08 | 5.27  | 6.9   | 54   | 5.87 | 5.11  | 6.62 | 61   | 0.22  | -0.85  | 1.28  | 0.696 | 0.690 |       |
|              | GG        | 5.65 | 4.87  | 6.44  | 59   | 6.12 | 5.31  | 6.92 | 54   | -0.47 | -1.54  | 0.61  | 0.398 | 0.405 |       |
| rs1176744    | AA        | 6.14 | 5.4   | 6.87  | 65   | 6.08 | 5.37  | 6.78 | 70   | 0.05  | -0.92  | 1.04  | 0.909 | 0.939 |       |
|              | AC        | 5.37 | 4.56  | 6.18  | 56   | 6.01 | 5.20  | 6.82 | 54   | -0.64 | -1.72  | 0.45  | 0.249 | 0.608 |       |
|              | CC        | 5.38 | 3.77  | 6.98  | 13   | 5.36 | 3.88  | 6.84 | 15   | 0.02  | -2.15  | 2.19  | 0.986 | 0.757 |       |
| rs2276307    | AA        | 5.65 | 4.98  | 6.32  | 80   | 6.09 | 5.39  | 6.78 | 77   | -0.44 | -1.34  | 0.47  | 0.343 | 0.684 |       |
|              | AG        | 6.32 | 5.44  | 7.19  | 46   | 5.9  | 5.12  | 6.67 | 55   | 0.42  | -0.72  | 1.56  | 0.473 | 0.549 |       |
|              | GG        | 4.35 | 2.25  | 6.46  | 8    | 6.64 | 4.65  | 8.64 | 8    | -2.29 | -5.19  | 0.62  | 0.122 | 0.892 |       |
| rs1672717    | AA        | 5.54 | 4.75  | 6.33  | 57   | 6.19 | 5.39  | 7    | 53   | -0.65 | -1.73  | 0.43  | 0.236 | 0.414 |       |
|              | AG        | 5.54 | 4.78  | 6.29  | 62   | 5.76 | 5.05  | 6.48 | 66   | -0.23 | -1.22  | 0.77  | 0.655 | 0.813 |       |
|              | GG        | 7.4  | 6.03  | 8.76  | 17   | 6.37 | 5.15  | 7.60 | 21   | 1.03  | -0.79  | 2.84  | 0.269 | 0.640 |       |
| rs17614942   | AC        | 3.86 | 2.49  | 5.22  | 17   | 6.59 | 5.31  | 7.88 | 19   | -2.73 | -4.6   | -0.87 | 0.004 | 0.156 | 0.896 |
|              | AA        | 5.58 | 0.03  | 11.13 | 1    | 4.04 | -1.65 | 9.73 | 1    | 1.54  | -6.38  | 9.47  | 0.703 | 0.964 |       |
|              | CC        | 6.09 | 5.52  | 6.66  | 117  | 5.97 | 5.42  | 6.53 | 119  | 0.12  | -0.61  | 0.84  | 0.757 | 0.958 |       |

<sup>a</sup>Genetic polymorphisms that were associated with more than 1.5 drinks/drinking day difference between the ondansetron and placebo groups, and that had more than five subjects within each treatment group, are enclosed within boxes. SNP=single-nucleotide polymorphism; DDD=drinks per drinking day; CI=confidence interval; FDR=false discovery rate.

<sup>b</sup>As mentioned in the Method section, FDR values were assessed only for the variants that survived the "screening process".

**Supplementary Table 3. Combinations of Genotypes Significantly Associated with the Primary Outcome Measure, Drinks per Drinking Day<sup>a</sup>**

| Combination | Genotype Combination                                                            | Population Carrying the Genotype Combination | Estimated Mean Difference for DDD (95% CI) and p-Value |
|-------------|---------------------------------------------------------------------------------|----------------------------------------------|--------------------------------------------------------|
| 1           | <i>SLC6A4</i> -LL/TT + <i>HTR3A</i> -rs1176713-GG                               | O=3<br>P=3<br>(2%)                           | -7.64<br>(-12.65 to -2.63)<br>0.003                    |
| 2           | <i>SLC6A4</i> -LL/TT + <i>HTR3B</i> -rs17614942-AC                              | O=6<br>P=4<br>(4%)                           | -4.25<br>(-7.87 to -0.63)<br>0.021                     |
| 3           | <i>SLC6A4</i> -LL/TT + <i>HTR3A</i> -rs1150226-AG + <i>HTR3B</i> -rs17614942-AC | O=4<br>P=3<br>(3%)                           | -4.05<br>(-8.41 to 0.31)<br>0.069                      |
| 4           | <i>SLC6A4</i> -LL/TT + <i>HTR3A</i> -rs1150226-AG                               | O=5<br>P=3<br>(3%)                           | -3.92<br>(-8.09 to 0.26)<br>0.066                      |

All comparisons are between the ondansetron and placebo groups and are listed in descending order of magnitude of their drinks per drinking day reductions; mean differences for DDD are in standard drinks; negative values indicate improvement from baseline. DDD=drinks per drinking day; CI=confidence interval; O=ondansetron; P=placebo.
